# Supplementary material for: Impact of Melatonin on RAW264.7 Macrophages during Mechanical Strain
Source: MDPI journal article supplement (doi:10.3390/ijms232113397), 2022-11-02
Supplement: s1 [file s1]

# Impact of Melatonin on RAW264.7 Macrophages during Mechanical Strain

Eva Paddenberg <sup>1</sup>, Anne Forneck <sup>1</sup>, Matthias Widbiller <sup>2</sup>, Martyna Smeda <sup>2</sup>, Jonathan Jantsch <sup>3,4</sup>, Peter Proff <sup>1</sup>, Christian Kirschneck <sup>1,†</sup> and Agnes Schröder <sup>1,3,\*,†</sup>

<sup>1</sup> Department of Orthodontics, University Hospital Regensburg, 93053 Regensburg, Germany

<sup>2</sup> Department of Conservative Dentistry and Periodontology, University Hospital Regensburg, 93053 Regensburg, Germany

<sup>3</sup> Department of Microbiology and Hygiene, University Hospital Regensburg, 93053 Regensburg, Germany

<sup>4</sup> Institute for Medical Microbiology, Immunology and Hygiene University Hospital Cologne and Faculty of Medicine, University of Cologne, 50935 Cologne, Germany

\* Correspondence: agnes.schroeder@ukr.de; Tel.: +49-941-944-4991

† These authors contributed equally to this work.

## Supplementary Material

### Uncropped Westernblots

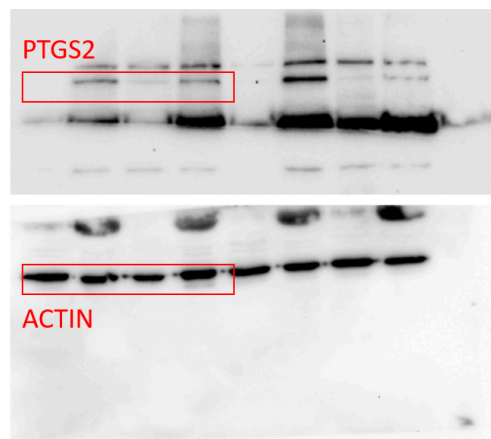

Figure S1. Uncropped Western Blot for Figure 2h.

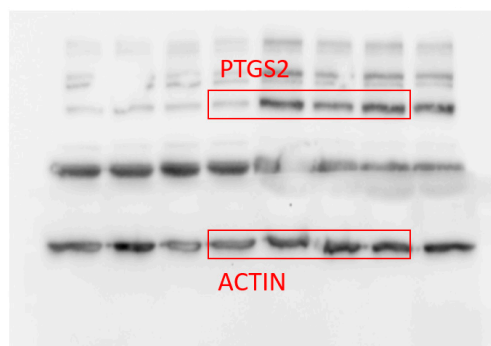

Figure S2. Uncropped Western Blot for Figure 3h.

Cell numbers and LDH release.

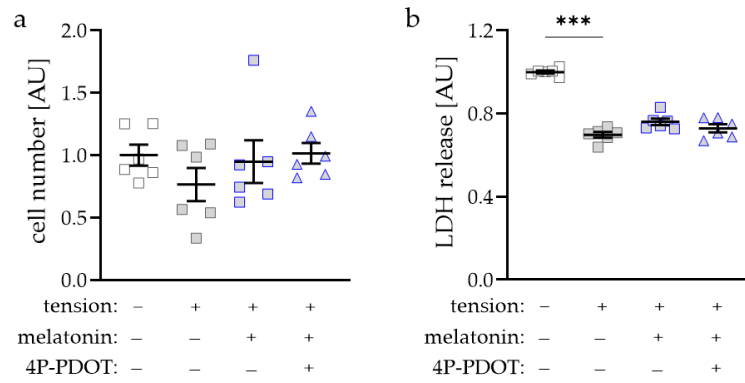

**Figure S3** Impact of melatonin and tensile strain on cell number (a) and lactatdehydrogenase (LDH) release. n=6; *Statistics*: Welch-corrected ANOVA with Games-Howell multiple comparison tests; \*\*\* $P < 0.001$

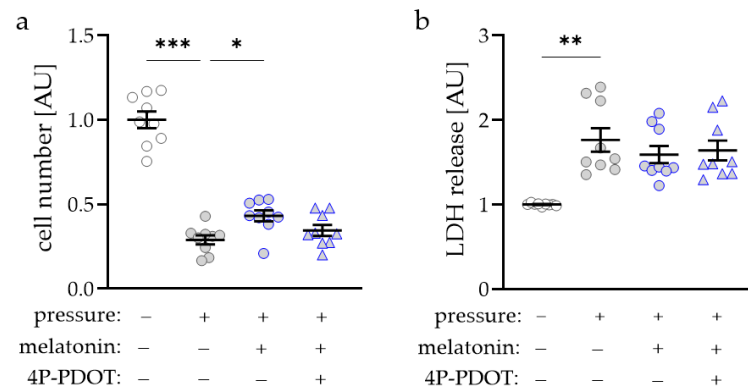

**Figure S4** Impact of melatonin and compressive strain on cell number (a) and lactatdehydrogenase (LDH) release. n=9; *Statistics*: cell number: ordinary ANOVA with Holm-Sidak's multiple comparison tests; LDH release: Welch-corrected ANOVA with Games-Howell multiple comparison tests; \* $P < 0.05$ , \*\*\* $P < 0.001$ .
